# Supplementary figures and images for: Darting across space and time: parametric modulators of sex-biased conditioned fear responses
Source: PubMed Central journal article supplement — Learn Mem. 2022 Jul;29(7):171–80. doi: 10.1101/lm.053587.122 (PMC9291203; doi:10.1101/lm.053587.122), 2022-07

**A**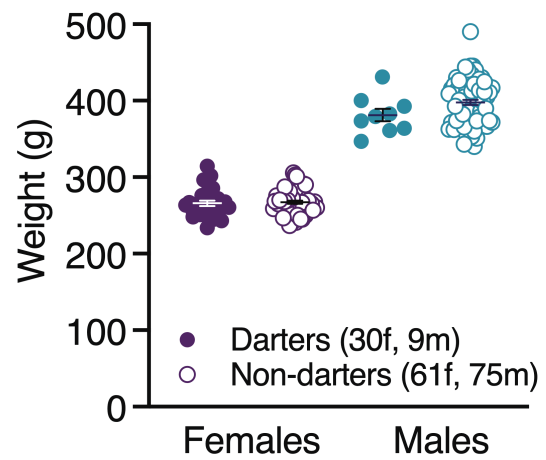**B**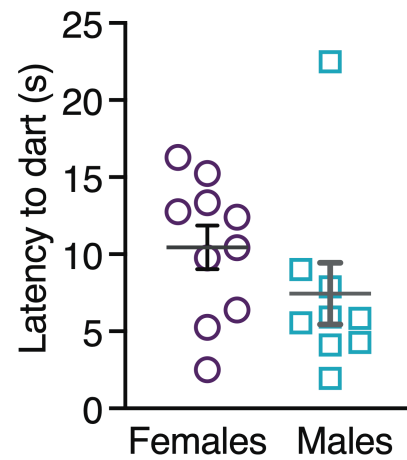**C**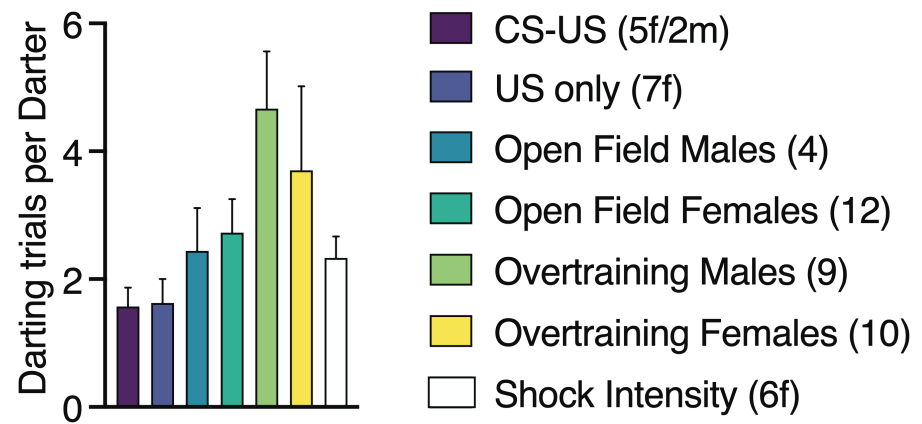

Supplement: supp_29.7.171_Supplemental_Figure_1.pdf [file supp_29.7.171_Supplemental_Figure_1.pdf]
